# Supplementary material for: Genetics of self-reported risk-taking behaviour, trans-ethnic consistency and relevance to brain gene expression
Source: PubMed Central journal article supplement (PMC6123450; doi:10.1038/s41398-018-0236-1), 2018-09-04

Supplementary Figure 3

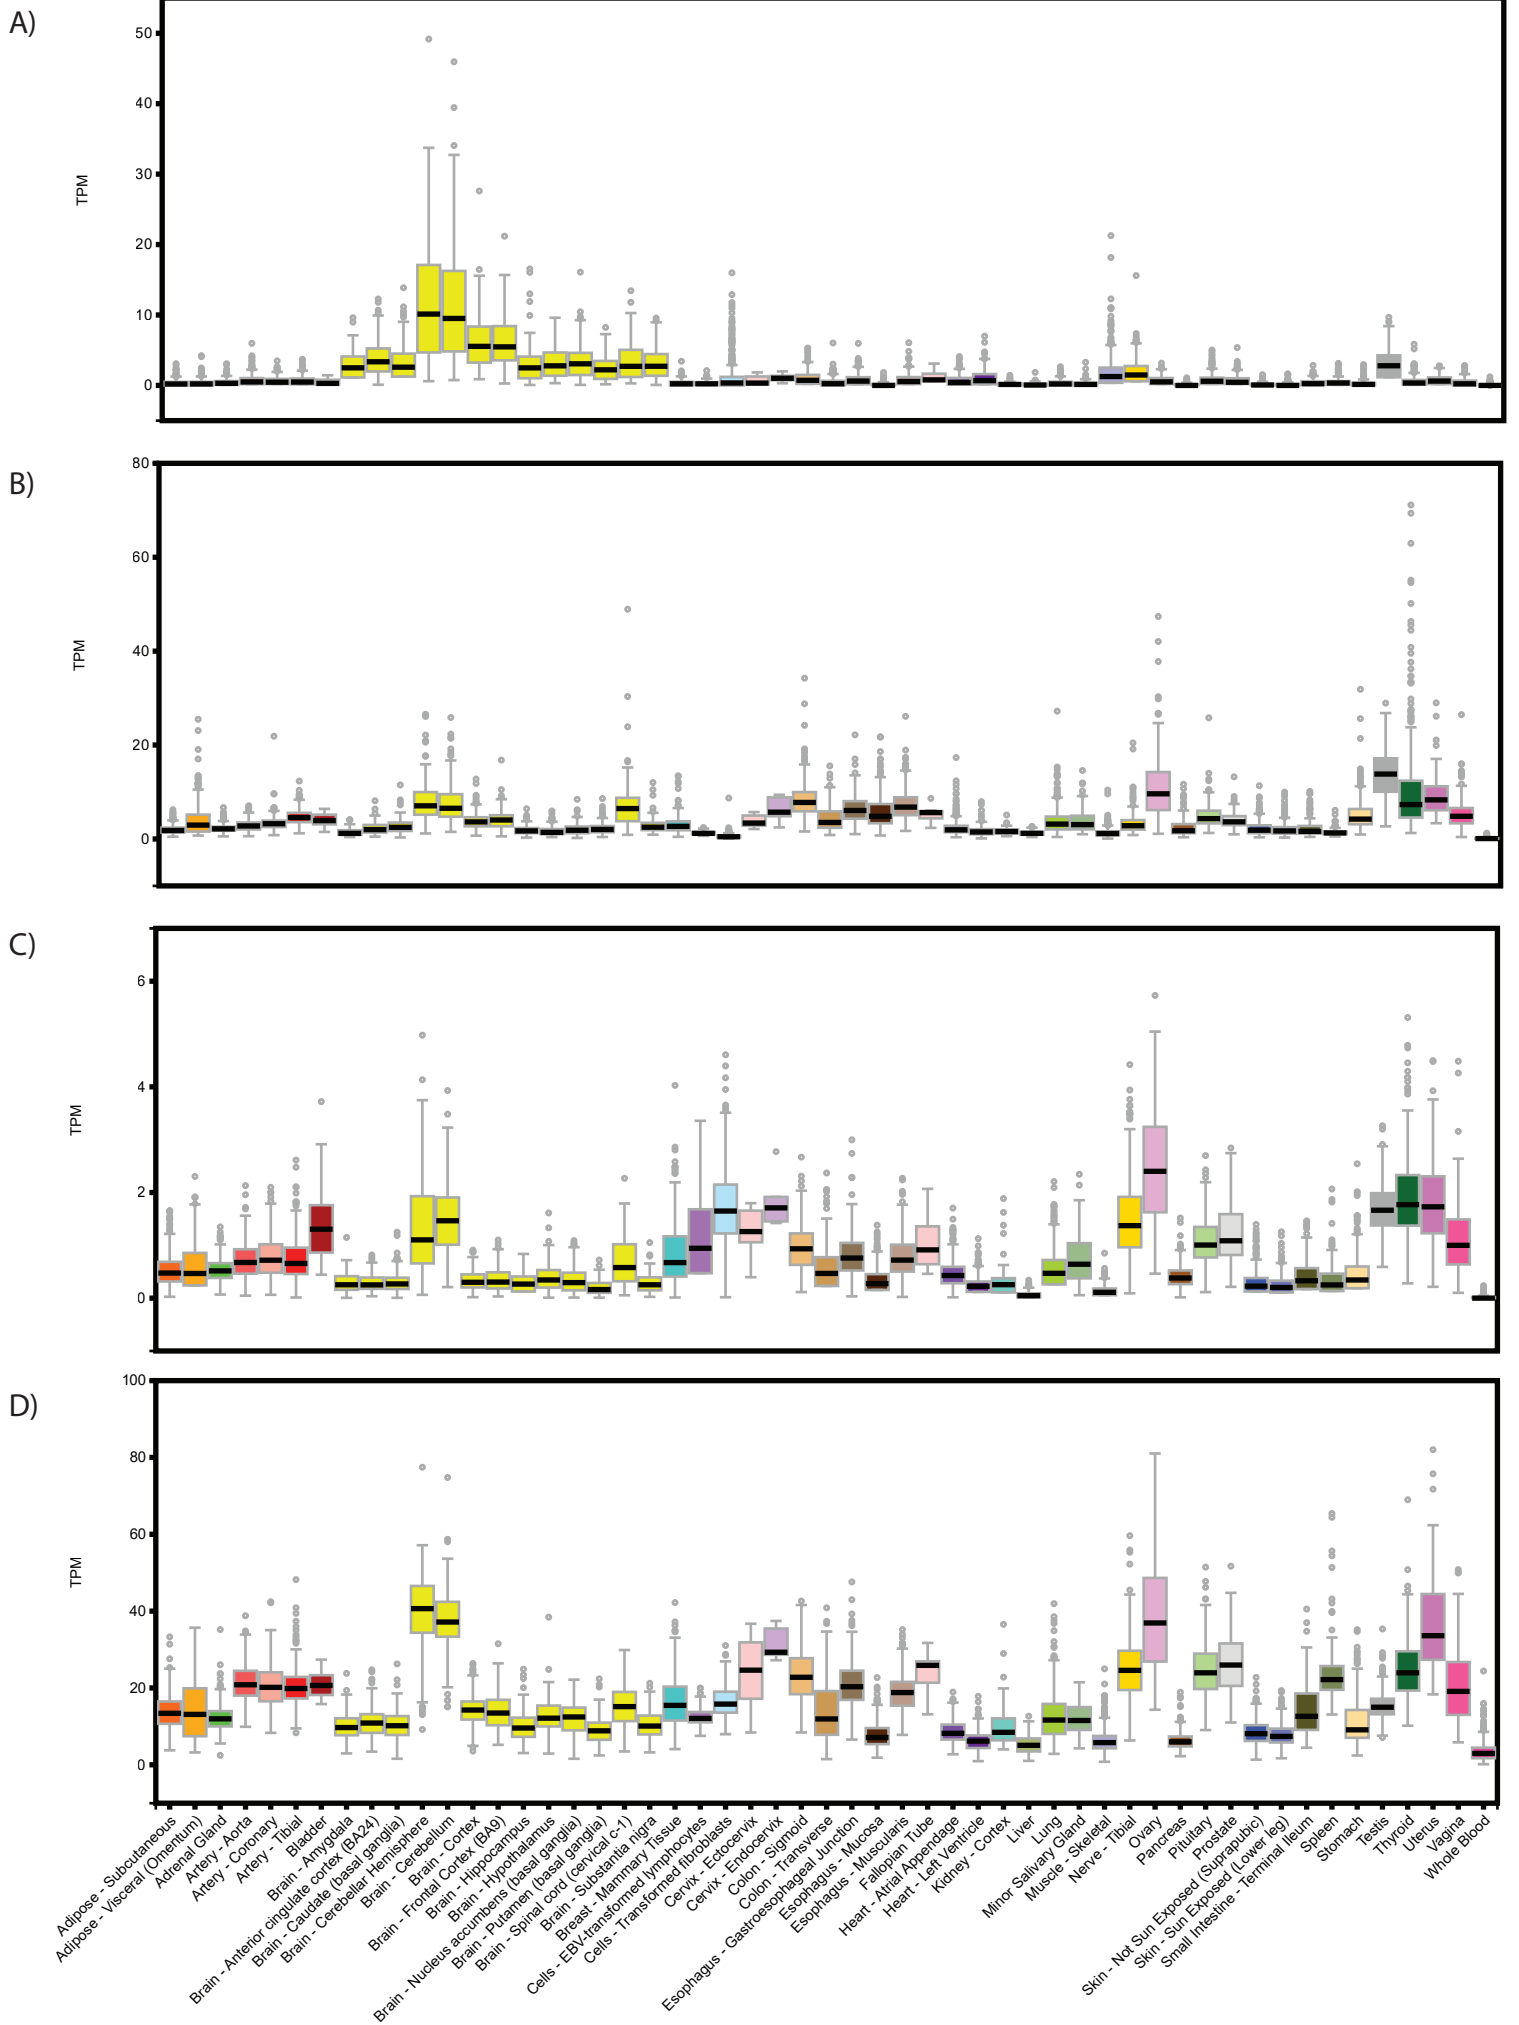

E)

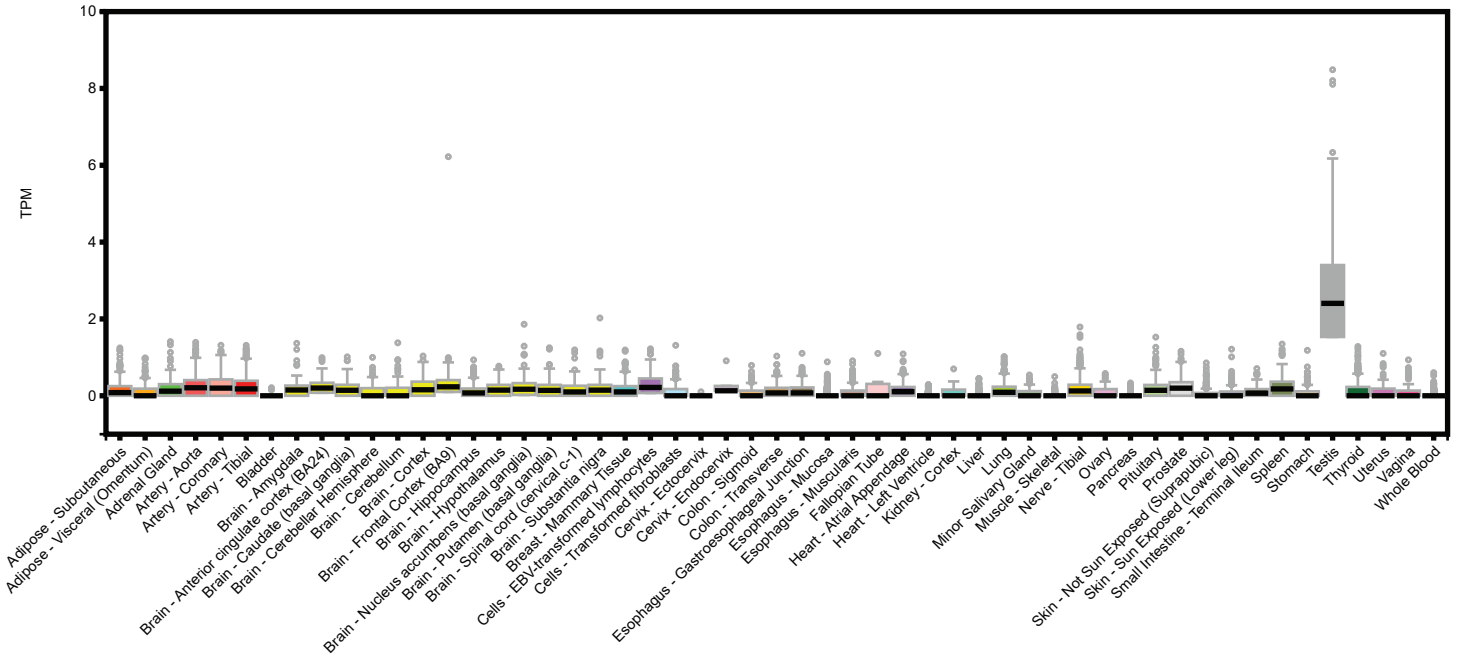

Supplement: 41398_2018_236_MOESM4_ESM.pdf [file 41398_2018_236_MOESM4_ESM.pdf]
